# Supplementary material
Source: PubMed Central journal article supplement (PMC4161120)
Supplement: NIHMS487855-supplement-Supplement.pdf [file NIHMS487855-supplement-Supplement.pdf]

# Mayer & Park: Working Memory Encoding and False Memory in Schizophrenia and Bipolar Disorder in a Spatial Delayed Response Task

## Supplementary Material

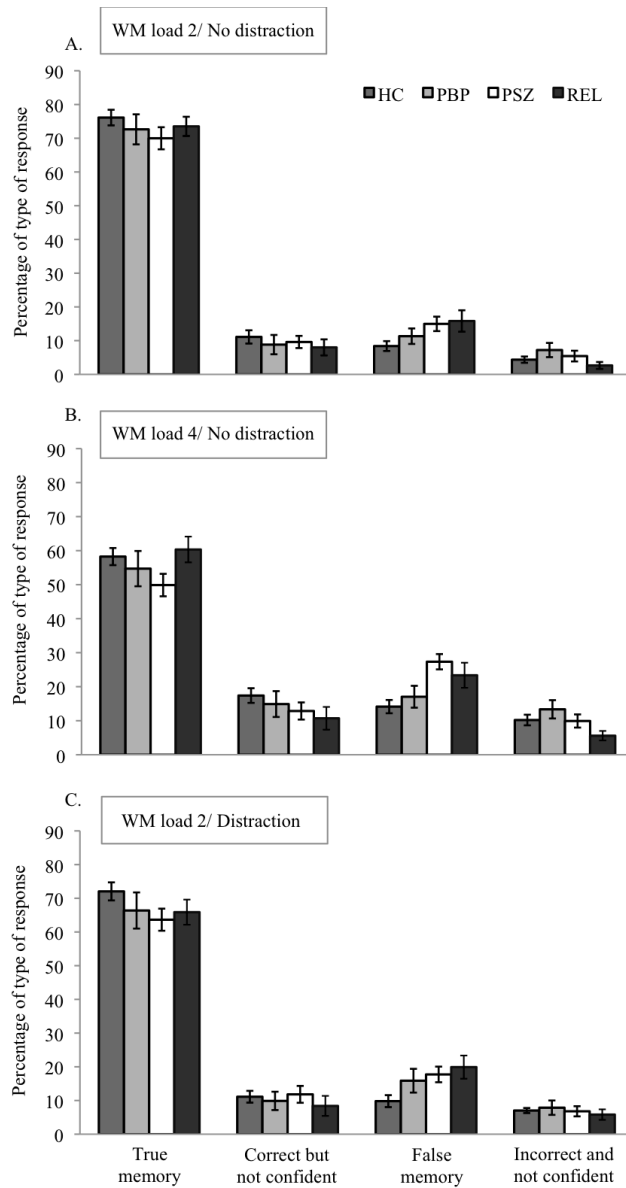

*Supplementary Figure 1.* Results from the confidence rating in the three experimental conditions. The percentage of four types of responses is shown: True memory (correct and confident response), correct but not confident responses, false memory (incorrect and

confident response) and incorrect and not confident responses. Vertical bars represent the standard error of the mean. HC = healthy controls, PBP = patients with bipolar disorder, PSZ = patients with schizophrenia, REL = unaffected first-degree relatives of PSZ.
